# Supplementary material for: Theoretical studies of the additives for copper electroplating in PCB by DFT and MD simulations
Source: Royal Society of Chemistry journal article supplement (doi:10.1039/d5nj02183a), 2025-09-09
Supplement: d5nj02183a1.pdf [file d5nj02183a1.pdf]

# **Theoretical Studies of the Additives for Copper Electroplating in PCB by DFT and MD simulation**

Wenjing Gao <sup>a</sup>, Boyu Gao <sup>a,b</sup>, Yiding Zhao <sup>b</sup>, Yumeng Lu <sup>a</sup>, Renhong Chen <sup>a</sup>, Maozhong An <sup>c</sup>, and

Anmin Liu <sup>a,\*</sup>

<sup>a</sup> School of Chemical Engineering, Ocean and Life Sciences, Dalian University of Technology,  
Panjin 124221, China.

E-mail: [liuanmin@dlut.edu.cn](mailto:liuanmin@dlut.edu.cn)

<sup>b</sup> School of Chemical Engineering, Dalian University of Technology, Dalian, China.

<sup>c</sup> School of Chemistry and Chemical Engineering, Harbin Institute of Technology, Harbin 150001,  
China.

**Table S1** HOMO and LUMO data of four kinds of leveling agent molecules

| leveling agent | $E_{HOMO}(\text{eV})$ | $E_{LUMO}(\text{eV})$ | $\Delta E(\text{eV})$ |
|----------------|-----------------------|-----------------------|-----------------------|
| DB             | -5.723                | 0.595                 | 6.318                 |
| Indigo         | -5.298                | -4.498                | 0.800                 |
| NTBC           | -6.112                | -3.664                | 2.448                 |
| ST             | -5.162                | -1.783                | 3.379                 |

**Table S2** The HOMO and LUMO data of eight kinds of inhibitor molecules

| Inhibitor | $E_{HOMO}(\text{eV})$ | $E_{LUMO}(\text{eV})$ | $\Delta E(\text{eV})$ |
|-----------|-----------------------|-----------------------|-----------------------|
| DSI       | -6.153                | -2.216                | 3.937                 |
| EPE       | -4.800                | -1.825                | 2.975                 |
| PPG       | -5.613                | 0.614                 | 6.227                 |
| PEG       | -6.236                | 0.472                 | 6.708                 |
| PEG 2000  | -5.744                | 0.481                 | 6.225                 |
| PEG 4000  | -5.826                | -0.623                | 5.203                 |
| PEG 6000  | -5.550                | -2.112                | 3.438                 |
| PEG 8000  | -4.384                | -4.312                | 0.072                 |

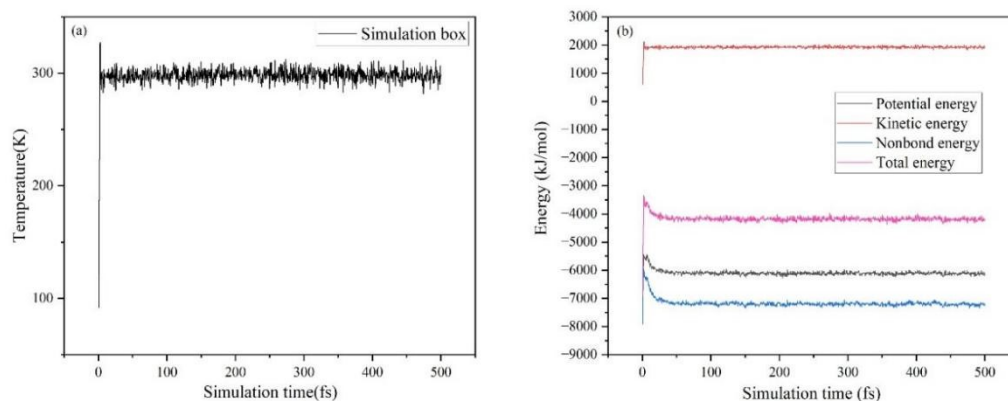**Fig. S1** The equilibrium of temperature (a) and energy (b) of DB

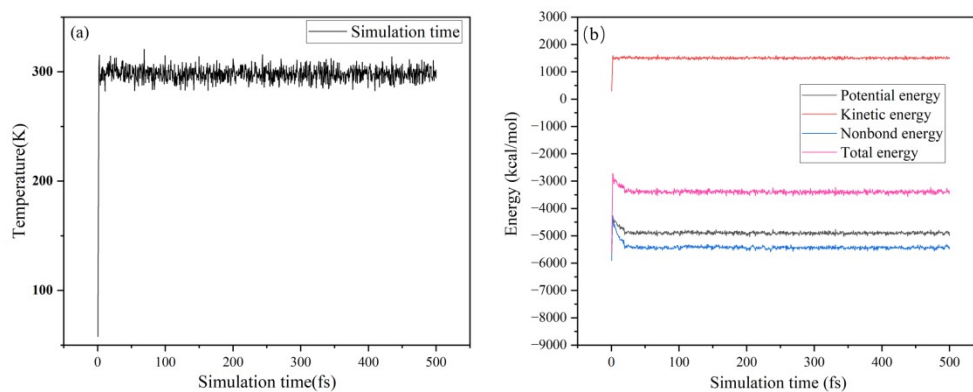

**Fig. S2** The equilibrium of temperature (a) and energy (b) of Indigo

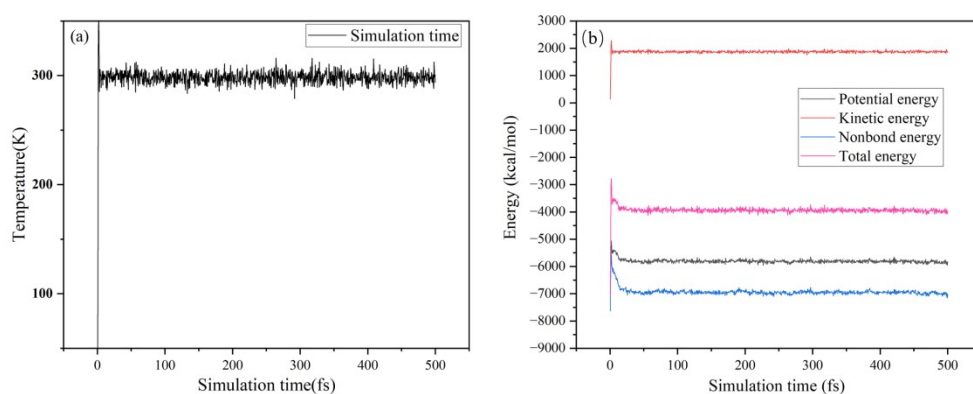

**Fig. S3** The equilibrium of temperature (a) and energy (b) of NTBC

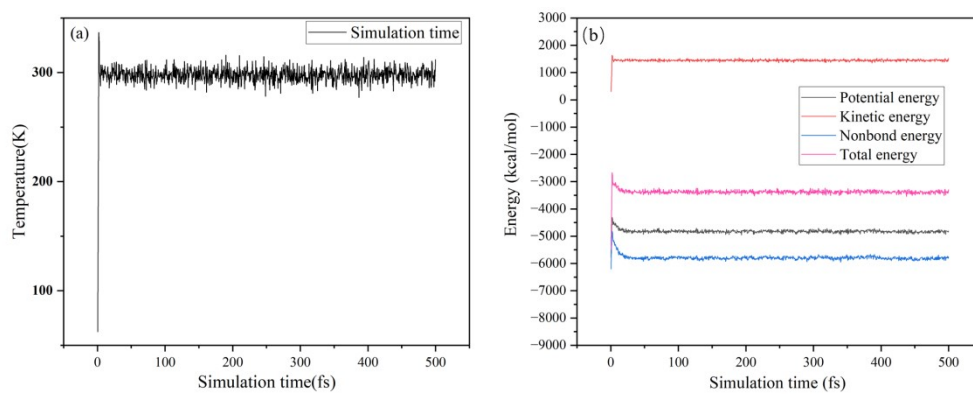

**Fig. S4** The equilibrium of temperature (a) and energy (b) of ST

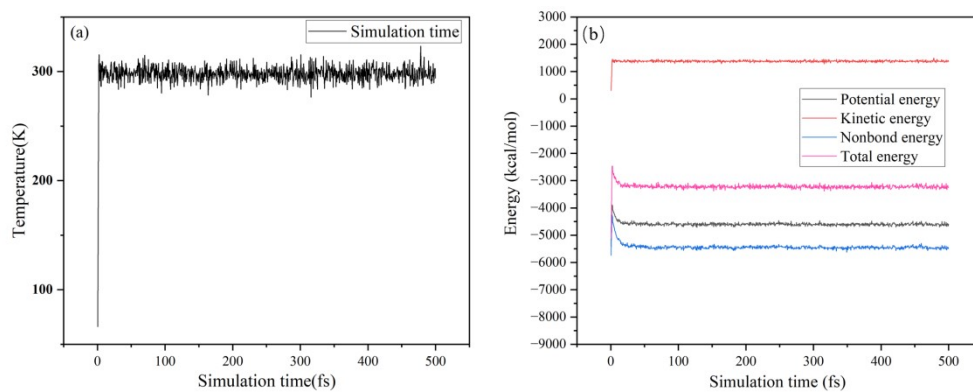

**Fig. S5** The equilibrium of temperature (a) and energy (b) of DSI

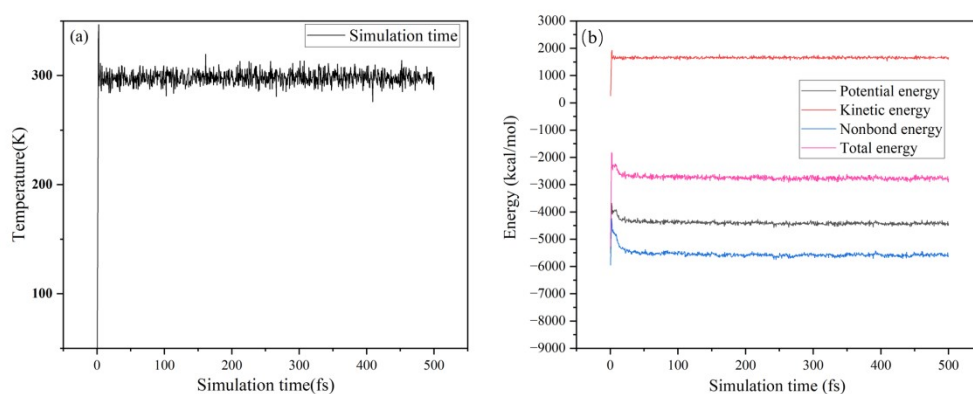

**Fig. S6** The equilibrium of temperature (a) and energy (b) of EPE

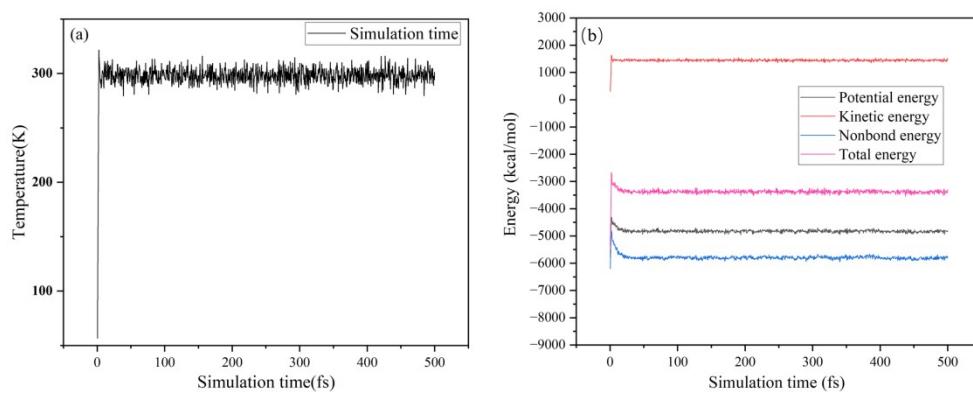

**Fig. S7** The equilibrium of temperature (a) and energy (b) of PPG

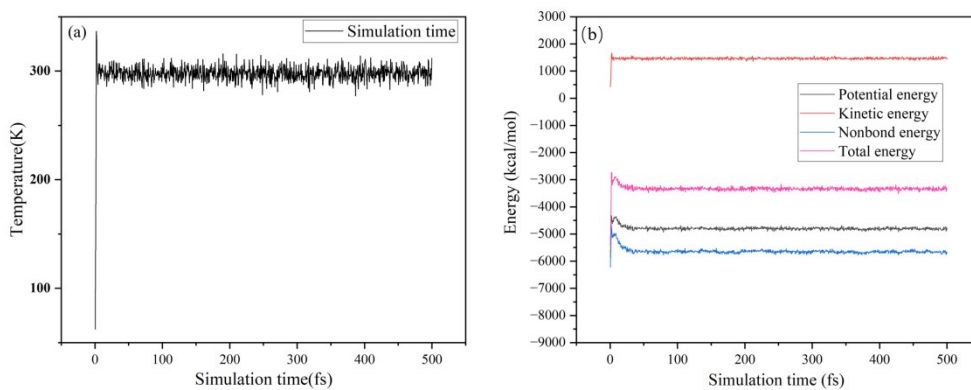

**Fig. S8** The equilibrium of temperature (a) and energy (b) of PEG

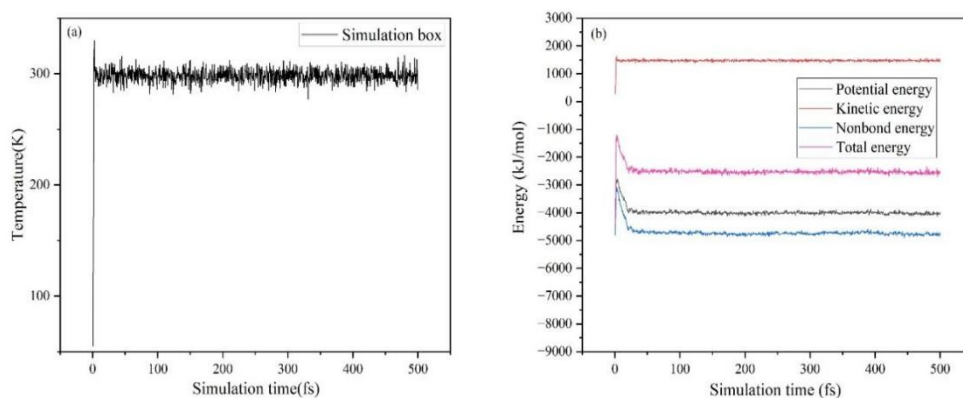

**Fig. S9** The equilibrium of temperature (a) and energy (b) of PEG 2000

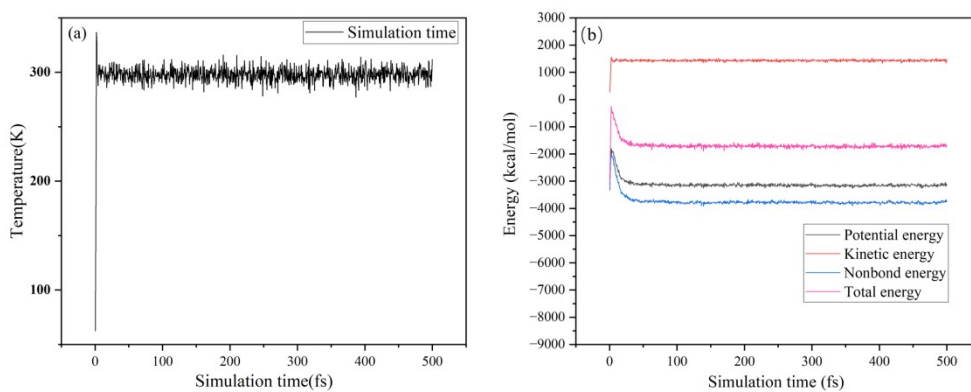

**Fig. S10** The equilibrium of temperature (a) and energy (b) of PEG 4000

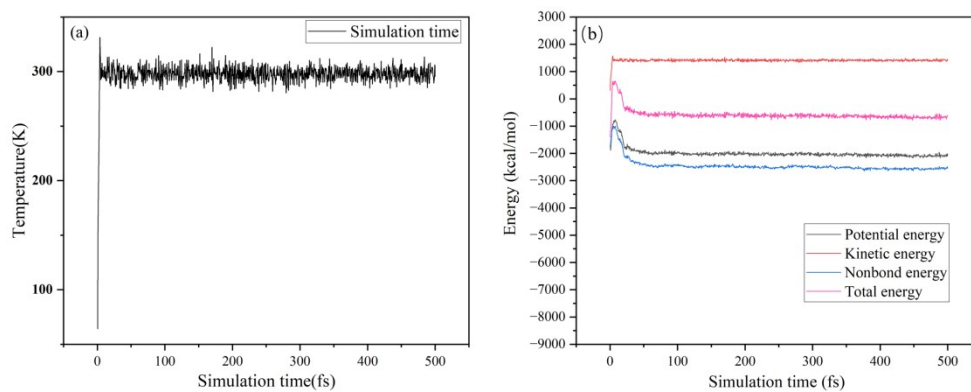

**Fig. S11** The equilibrium of temperature (a) and energy (b) of PEG 6000

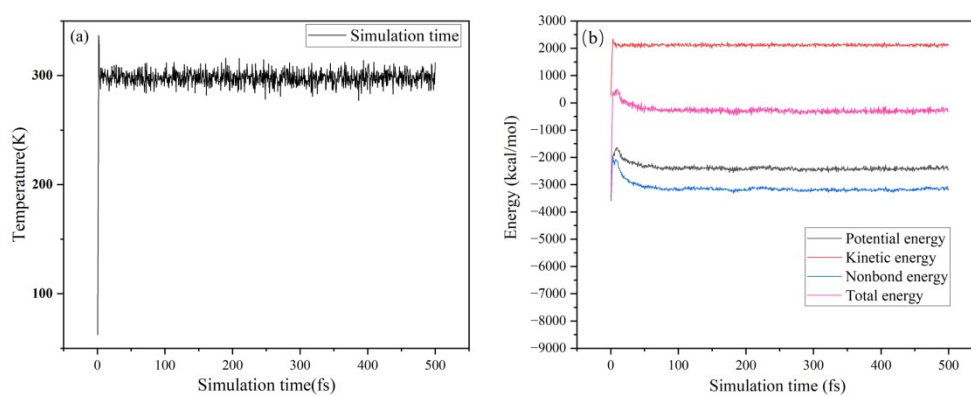

**Fig. S12** The equilibrium of temperature (a) and energy (b) of PEG 8000
